# Supplementary material
Source: ML conference proceedings conference paper supplement (https://proceedings.mlr.press/v48/johansson16.html)
Supplement: Supplementary file 1 [file johansson16-supp.pdf]

---

# Supplementary Material for: Learning Representations for Counterfactual Inference

---

**Fredrik D. Johansson\***

CSE, Chalmers University of Technology, Göteborg, SE-412 96, Sweden

FREJOHK@CHALMERS.SE

**Uri Shalit\***

**David Sontag**

CIMS, New York University, 251 Mercer Street, New York, NY 10012 USA

SHALIT@CS.NYU.EDU

DSONTAG@CS.NYU.EDU

\* **Equal contribution**

## A. Proof of Theorem 1

We use a result implicit in the proof of Theorem 2 of [Cortes & Mohri \(2014\)](#), for the case where  $\mathcal{H}$  is the set of linear hypotheses over a fixed representation  $\Phi$ . [Cortes & Mohri \(2014\)](#) state their result for the case of domain adaptation: in our case, the factual distribution is the so-called “source domain”, and the counterfactual distribution is the “target domain”.

**Theorem A1.** [[Cortes & Mohri \(2014\)](#)] Using the notation and assumptions of Theorem 1, for both  $Q = P^F$  and  $Q = P^{CF}$ :

$$\begin{aligned} & \frac{\lambda}{\mu r} (\mathcal{L}_Q(\hat{\beta}^F(\Phi)) - \mathcal{L}_Q(\hat{\beta}^{CF}(\Phi)))^2 \leq \\ & \text{disc}_{\mathcal{H}_l}(\hat{P}_{\Phi}^F, \hat{P}_{\Phi}^{CF}) + \\ & \min_{h \in \mathcal{H}_l} \frac{1}{n} \left( \sum_{i=1}^n |\hat{y}_i^F(\Phi, h) - y_i^F| + |\hat{y}_i^{CF}(\Phi, h) - y_i^{CF}| \right) \end{aligned} \quad (1)$$

In their work, [Cortes & Mohri \(2014\)](#) assume the  $\mathcal{H}$  is a reproducing kernel Hilbert space (RKHS) for a universal kernel, and they do not consider the role of the representation  $\Phi$ . Since the RKHS hypothesis space they use is much stronger than the linear space  $\mathcal{H}_l$ , it is often reasonable to assume that the second term in the bound 1 is small. We however cannot make this assumption, and therefore we wish to explicitly bound the term  $\min_{h \in \mathcal{H}_l} \frac{1}{n} (\sum_{i=1}^n |\hat{y}_i^F(\Phi, h) - y_i^F| + |\hat{y}_i^{CF}(\Phi, h) - y_i^{CF}|)$ , while using the fact that we have control over the representation  $\Phi$ .

**Lemma 1.** Let  $\{(x_i, t_i, y_i^F)\}_{i=1}^n$ ,  $x_i \in \mathcal{X}$ ,  $t_i \in \{0, 1\}$  and  $y_i^F \in \mathcal{Y} \subseteq \mathbb{R}$ . We assume that  $\mathcal{X}$  is a metric space with metric  $d$ , and that there exist two function  $Y_0(x)$  and  $Y_1(x)$  such that  $y_i^F = t_i Y_1(x_i) + (1 - t_i) Y_0(x_i)$ , and in addition we define  $y_i^{CF} = (1 - t_i) Y_1(x_i) + t_i Y_0(x_i)$ . We further

assume that the functions  $Y_0(x)$  and  $Y_1(x)$  are Lipschitz continuous with constants  $K_0$  and  $K_1$  respectively, such that  $d(x_a, x_b) \leq c \implies |Y_t(x_a) - Y_t(x_b)| \leq K_t c$ . Define  $j(i) \in \arg \min_{j \in \{1 \dots n\} \text{ s.t. } t_j = 1 - t_i} d(x_j, x_i)$  to be the nearest neighbor of  $x_i$  among the group that received the opposite treatment from unit  $i$ , for all  $i \in \{1 \dots n\}$ . Let  $d_{i,j} = d(x_i, x_j)$

For any  $b \in \mathcal{Y}$  and  $h \in \mathcal{H}$ :

$$|b - y_i^{CF}| \leq |b - y_{j(i)}^F| + K_{1-t_i} d_{i,j(i)}$$

*Proof.* By the triangle inequality, we have that:

$$|b - y_i^{CF}| \leq |b - y_{j(i)}^F| + |y_{j(i)}^F - y_i^{CF}|.$$

By the Lipschitz assumption on  $Y_{1-t_i}$ , and since  $d(x_i, x_{j(i)}) \leq d_{i,j(i)}$ , we obtain that

$$|y_{j(i)}^F - y_i^{CF}| = |Y_{1-t_i}(x_{j(i)}) - Y_{1-t_i}(x_i)| \leq d_{i,j(i)} K_{1-t_i}.$$

By definition  $y_i^{CF} = Y_{1-t_i}(x_i)$ . In addition, by definition of  $j(i)$ , we have  $t_{j(i)} = 1 - t_i$ , and therefore  $y_{j(i)}^F = Y_{1-t_i}(x_{j(i)})$ , proving the equality. The inequality is an immediate consequence of the Lipschitz property.  $\square$

We restate Theorem 1 and prove it.

**Theorem 1.** For a sample  $\{(x_i, t_i, y_i^F)\}_{i=1}^n$ ,  $x_i \in \mathcal{X}$ ,  $t_i \in \{0, 1\}$  and  $y_i \in \mathcal{Y}$ , recall that  $y_i^F = t_i Y_1(x_i) + (1 - t_i) Y_0(x_i)$ , and in addition define  $y_i^{CF} = (1 - t_i) Y_1(x_i) + t_i Y_0(x_i)$ . For a given representation function  $\Phi : \mathcal{X} \rightarrow \mathbb{R}^d$ , let  $\hat{P}_{\Phi}^F = (\Phi(x_1), t_1), \dots, (\Phi(x_n), t_n)$ ,  $\hat{P}_{\Phi}^{CF} = (\Phi(x_1), 1 - t_1), \dots, (\Phi(x_n), 1 - t_n)$ . We assume that  $\mathcal{X}$  is a metric space with metric  $d$ , and that the potential outcome functions  $Y_0(x)$  and  $Y_1(x)$  are Lipschitz continuous with constants  $K_0$  and  $K_1$  respectively, such that  $d(x_a, x_b) \leq c \implies |Y_t(x_a) - Y_t(x_b)| \leq K_t c$ .

Let  $\mathcal{H}_l \subset \mathbb{R}^{d+1}$  be the space of linear functions, and for  $\beta \in \mathcal{H}_l$ , let  $\mathcal{L}_P(\beta) = \mathbb{E}_{(x,t,y) \sim P} [L(\beta(x,t), y)]$  be the expected loss of  $\beta$  over distribution  $P$ . Let  $r = \max(\mathbb{E}_{(x,t) \sim P^F} [\|\Phi(x), t\|_2], \mathbb{E}_{(x,t) \sim P^{CF}} [\|\Phi(x), t\|_2])$ . For  $\lambda > 0$ , let  $\hat{\beta}^F(\Phi) = \arg \min_{\beta \in \mathcal{H}_l} \mathcal{L}_{\hat{P}_\Phi^F}(\beta) + \lambda \|\beta\|_2^2$ , and  $\hat{\beta}^{CF}(\Phi)$  similarly for  $\hat{P}_\Phi^{CF}$ , i.e.  $\hat{\beta}^F(\Phi)$  and  $\hat{\beta}^{CF}(\Phi)$  are the ridge regression solutions for the factual and counterfactual empirical distributions, respectively.

Let  $\hat{y}_i^F(\Phi, h) = h^\top [\Phi(x_i), t_i]$  and  $\hat{y}_i^{CF}(\Phi, h) = h^\top [\Phi(x_i), 1 - t_i]$  be the outputs of the hypothesis  $h \in \mathcal{H}_l$  over the representation  $\Phi(x_i)$  for the factual and counterfactual settings of  $t_i$ , respectively. Finally, for each  $i \in \{1 \dots n\}$ , let  $j(i) \in \arg \min_{j \in \{1 \dots n\} \text{ s.t. } t_j = 1 - t_i} d(x_j, x_i)$  be the nearest neighbor of  $x_i$  among the group that received the opposite treatment from unit  $i$ . Let  $d_{i,j} = d(x_i, x_j)$ .

Then for both  $Q = P^F$  and  $Q = P^{CF}$  we have:

$$\frac{\lambda}{\mu r} (\mathcal{L}_Q(\hat{\beta}^F(\Phi)) - \mathcal{L}_Q(\hat{\beta}^{CF}(\Phi)))^2 \leq \quad (2)$$

$$\begin{aligned} & \text{disc}_{\mathcal{H}_l}(\hat{P}_\Phi^F, \hat{P}_\Phi^{CF}) + \\ & \min_{h \in \mathcal{H}_l} \frac{1}{n} \sum_{i=1}^n (|\hat{y}_i^F(\Phi, h) - y_i^F| + |\hat{y}_i^{CF}(\Phi, h) - y_i^{CF}|) \leq \end{aligned} \quad (3)$$

$$\begin{aligned} & \text{disc}_{\mathcal{H}_l}(\hat{P}_\Phi^F, \hat{P}_\Phi^{CF}) + \\ & \min_{h \in \mathcal{H}_l} \frac{1}{n} \sum_{i=1}^n (|\hat{y}_i^F(\Phi, h) - y_i^F| + |\hat{y}_i^{CF}(\Phi, h) - y_{j(i)}^F|) + \\ & \frac{K_0}{n} \sum_{i:t_i=1} d_{i,j(i)} + \frac{K_1}{n} \sum_{i:t_i=0} d_{i,j(i)}. \end{aligned}$$

*Proof.* Inequality (2) is immediate by Theorem A1. In order to prove inequality (3), we apply Lemma 1, setting  $b = \hat{y}_i^{CF}$  and summing over the  $i$ .  $\square$

## References

Cortes, Corinna and Mohri, Mehryar. Domain adaptation and sample bias correction theory and algorithm for regression. *Theoretical Computer Science*, 519:103–126, 2014.
